1 **A multiepitope fusion protein-based p-ELISA method for diagnosing bovine and**  
2 **goat brucellosis**

3

4 Dehui Yin<sup>1#</sup>, Qiongqiong Bai<sup>1#</sup>, Xiling Wu<sup>1</sup>, Han Li<sup>2</sup>, Jihong Shao<sup>1</sup>, Mingjun Sun<sup>3\*</sup>,  
5 Jingpeng Zhang<sup>1\*</sup>

6

7 <sup>1</sup> Key Lab of Environment and Health, School of Public Health, Xuzhou Medical  
8 University, Xuzhou, 221004, China

9 <sup>2</sup>Department of Infection Control, the First Hospital of Jilin University, Changchun,  
10 130021, China

11 <sup>3</sup> Laboratory of Zoonoses, China Animal Health And Epidemiology Center, Qingdao,  
12 266032, China

13

14 **Running Head:** P-ELISA for diagnosing animal brucellosis

15

16 # These authors contributed equally to this work

17 \*Correspondence:

18 Laboratory of Zoonoses, China Animal Health And Epidemiology Center, No.369

19 Nanjing Road, Qingdao, 266032, China. E-mail: sunmingjun@cahec.cn & School of

20 Public Health, Xuzhou Medical University, No. 129 Tongshan Road, Xuzhou, 221004,

21 China. E-mail: xiaopangpeng@126.com

22

23 **Abstract**

24 In recent years, the incidence of brucellosis has increased annually, which has caused  
25 tremendous economic losses in agriculture and husbandry in various countries.  
26 Therefore, developing rapid, sensitive and specific diagnostic techniques for  
27 brucellosis has become critical brucellosis research. Bioinformatics technology was  
28 used to predict the B cell epitopes of the main antigen proteins of *Brucella*, and the  
29 validity of each epitope was verified by indirect enzyme-linked immunosorbent assay  
30 (iELISA). The verified epitopes were connected in series to construct a multiepitope  
31 fusion protein, goat, bovine brucellosis sera, and rabbit sera were collected to verify  
32 the antigenicity and specificity of this protein. Then, the fusion protein was used as a  
33 diagnostic antigen to construct paper-based ELISA (p-ELISA) technology. A total of  
34 22 effective epitopes were predicted, and a fusion protein was successfully  
35 constructed, which showed good antigenicity and specificity. The constructed  
36 p-ELISA method was used for the simultaneous detection of bovine and goat  
37 brucellosis. ROC curve analysis showed that the sensitivity and specificity of protein  
38 detection in goat serum were 98.85% and 98.51%, respectively. The positive and the  
39 negative predictive value was 99.29% and 98.15%, respectively. When assessing  
40 bovine serum, the sensitivity and specificity were 97.85% and 96.61%, respectively.  
41 The positive and the negative predictive value was 98.28% and 97.33%, respectively.  
42 This study combined bioinformatics, fusion protein development and p-ELISA  
43 technologies to establish a sensitive and specific rapid diagnosis technology for  
44 brucellosis that can be used to assess the serum of bovine, goats and other livestock.

45 **Keywords:** brucellosis; bioinformatics technology; fusion protein; p-ELISA;  
46 serodiagnosis

47 **IMPORTANCE:** Brucellosis has caused tremendous economic losses in agriculture  
48 and husbandry in various countries. Therefore, developing rapid, sensitive and  
49 specific diagnostic techniques for brucellosis has become critical brucellosis research.  
50 In this study, we used immunoinformatic technology to predict the B cell epitopes in  
51 the major outer membrane proteins of Brucella, synthesized polypeptides and coupled  
52 them with KLH, screened these polypeptides by iELISA methods, selected effective  
53 polypeptides as diagnostic antigens, and established a p-ELISA for brucellosis  
54 diagnosis based on a multiepitope fusion protein that can be used to assess the serum  
55 of bovine, goats and other livestock.

56

## 57 **1 Introduction**

58       Currently, a high incidence of brucellosis, a hazardous zoonosis, is reemerging  
59 worldwide, especially in developing countries, posing not only a large threat to human  
60 health but also tremendous losses in the world economy[1]. *Brucella* infection can be  
61 caused by humans directly contacting *Brucella*-infected goats, bovine, pigs and other  
62 livestock and their secretions or excreta or eating *Brucella*-contaminated food[2]. Due  
63 to the diversity of clinical manifestations of brucellosis and the lack of specific  
64 clinical manifestations, the diagnosis of brucellosis is very difficult, and it is easily  
65 misdiagnosed as other febrile diseases, such as dengue fever, malaria, or viral  
66 bleeding diseases[3,4].

67       There are many methods for diagnosing *Brucella*. Serological diagnostics are the  
68 most widely used and mature methods. However, serological diagnosis requires  
69 specific and sensitive antigens[5]. Currently, the commonly used antigens include  
70 whole-cell antigen and lipopolysaccharide (LPS). However, these antigens easily  
71 cross-react with the antibodies of other bacteria, which affects the specificity of the  
72 diagnosis. Therefore, it is very important to develop new diagnostic antigens to  
73 improve the specificity and sensitivity of serological diagnostic methods[6]. A large  
74 number of vaccine studies show that the *Brucella* outer membrane protein has good  
75 immunogenicity, which provides a direction for finding new diagnostic antigens[7-9].  
76 The rapid development of paper-based enzyme-linked immunosorbent assay  
77 (p-ELISA) diagnostic methods based on paper chip technology provides a reference  
78 for the development of new brucellosis diagnostic methods[10].

79           In this study, five main antigen proteins of *Brucella* were screened, and the  
80 possible dominant B cell epitopes of these proteins were predicted by bioinformatics  
81 technology. We designed a new *Brucella* multiepitope fusion protein by concatenating  
82 the predicted dominant epitopes, making it a candidate antigen for the serological  
83 diagnosis of brucellosis. A rapid, sensitive and specific p-ELISA diagnostic technique  
84 for brucellosis that can detect protein in serum of bovine, goats and other livestock  
85 was successfully constructed.

86

## 87 **2. Materials and methods**

### 88 **2.1 Serum samples**

89 A total of 140 goat serum samples that were *Brucella* positive, 54 goat serum samples  
90 that were *Brucella* negative, 116 bovine serum samples that were *Brucella* positive,  
91 and 75 serum samples that were *Brucella* negative were provided by the China  
92 Animal Health and Epidemiology Center (Qingdao, China). All *Brucella*-positive and  
93 *Brucella*-negative sera were verified to be positive by the tube agglutination test and  
94 the Rose Bengal plate agglutination test (RBPT). All experiments involving animals  
95 or animal samples were fully compliant with ethical approval granted by the Animal  
96 Care and Ethics Committee of Xuzhou Medical University.

### 97 **2.2 Prediction and synthesis of peptide epitopes**

98 The *Brucella* outer membrane proteins (Omp) Omp16, Omp25, Omp31, Omp2b  
99 and BP26 were selected, and their amino acid sequences were obtained through the  
100 protein database at NCBI (<https://www.ncbi.nlm.nih.gov/protein/>). The conservation  
101 of the amino acid sequences was assessed by BLASTing. The prediction of B cell  
102 epitopes was carried out by using the B cell epitope prediction tool BepiPred linear  
103 epitope prediction 2.0 at IEDB (<http://tools.iedb.org/bcell/>). The predicted B cell  
104 epitope peptides were synthesized by Sangon Biotech (Shanghai, China) and coupled  
105 with keyhole limpet hemocyanin (KLH) with a purity of more than 90%.

### 106 **2.3 Epitope antigenicity screening**

107 Forty-five bovine and goat *Brucella*-positive sera were randomly selected to  
108 identify the antigenicity of the peptides through an indirect enzyme-linked

109 immunosorbent assay (iELISA). In addition, a KLH carrier negative control and an  
110 LPS positive antigen control were established. For the procedure, in a 96-well  
111 microtiter plate (NUNC, Denmark), 100  $\mu$ L of peptide (30  $\mu$ g/mL in carbonate buffer  
112 solution (CBS), pH 9.6) was added to each well and incubated overnight at 4°C. The  
113 wells were blocked with 300  $\mu$ L/well of 5% skimmed milk powder (Sangon,  
114 Shanghai) at 37°C for 2 hours, and then, 100  $\mu$ L/well of *Brucella* serum was added  
115 (1:400 dilution with PBS) and incubated at 37°C for 1 hour. HRP-labeled protein G  
116 (diluted 1:5000, PBS) (Thermo, USA) was then added and incubated at room  
117 temperature for 30 min, after which an EL-TMB kit was utilized (Sangon). Optical  
118 density was measured at 450 nm (OD450) using an ELISA plate reader (BioTek,  
119 USA). After each step, the plates were washed 3 times with PBST.

#### 120 **2.4 Preparation of the fusion protein**

121 The effective peptides were selected to be connected in series, and adjacent  
122 peptides were linked by the 'GGGS' linker. For the concatenated amino acid sequence,  
123 the molecular weight ([https://web.expasy.org/compute\\_pi/](https://web.expasy.org/compute_pi/)), spatial conformation  
124 (<http://zhanglab.ccmb.med.umich.edu/I-TASSER/>) and other parameters were  
125 predicted. According to the amino acid sequence after concatenation, the codon was  
126 reversed, and the prokaryotic expression was optimized. The plasmid was constructed  
127 by whole gene synthesis and subcloned into expression vector pET30a (Beijing  
128 Protein Innovation, Beijing) and then transferred into competent cells (BL21 cells) for  
129 IPTG-induced expression. Specifically, competent cells (BL21 cells) (100  $\mu$ L), stored  
130 at -80°C, were slowly thawed on ice, after which the ligation product was added to the

131 cells and mixed well; the cells were then placed on ice for 30 min, heat shocked at  
132 42°C for 90 s and then incubated in an ice bath for 2 min. Subsequently, 800 µL of  
133 nonresistant LB medium was added, incubated at 37°C for 45 min and centrifuged at  
134 5000 rpm for 3 min. The majority of the supernatant was discarded, leaving  
135 approximately 100-150 µL, which was used to resuspended the cell pellet. The  
136 resuspended cells were added to LB plates with the corresponding resistance  
137 antibiotic and spread over plates, which were air-dried and cultured upside down and  
138 placed in an incubator at 37°C overnight. Then, the transformed BL21 cells were  
139 selected and cultured in 1.5 mL of LB liquid medium at 37°C and shaken at 200 rpm.  
140 The cells were incubated until the OD<sub>600</sub>=0.6, at which time they were induced by  
141 IPTG (0.5 mM) and cultured for 2 hours at 37°C. One milliliter of induced bacterial  
142 solution was centrifuged at 12000 rpm for 1 min, the supernatant was discarded, and  
143 the precipitate was resuspended in 50-100 µL of 10 mM Tris-HCl (pH 8.0) solution  
144 (the amount of added buffer was dependent on the amount of bacteria). Loading  
145 buffer equal to twice the volume of the resuspended precipitate was added, after  
146 which the sample was boiled at 100°C for 5 min and then assessed by SDS-PAGE  
147 electrophoresis.

148 After validation, 2 µL of activated bacterial solution was transferred to 750 mL of  
149 LB liquid medium at 37°C, spun at 200 rpm and incubated until the absorbance  
150 reached OD<sub>600</sub> = 0.6-0.8. IPTG (0.5 mM) was added for overnight induction at 16°C.  
151 After centrifugation at 6000 rpm for 5 min, the supernatant was discarded, and the  
152 bacteria were collected. The bacteria were resuspended with 20-30 mL of 10 mM



153 Tris-HCl (pH 8.0) solution and fragmented by ultrasonication (500 W, 60 times, 10 s  
154 each time, 15 s intervals). One hundred microliters of bacterial suspension was  
155 collected after ultrasonic treatment and centrifuged at 12000 rpm for 10 min. Fifty  
156 microliters of supernatant was poured into another EP tube. After the supernatant was  
157 removed, the precipitate was resuspended with 50  $\mu$ L of 10 mM Tris-HCl (pH 8.0)  
158 solution and assessed by SDS-PAGE electrophoresis.

## 159 **2.5 Purification of fusion protein**

160 A nickel column (Ni Sepharose 6 Fast Flow, GE Healthcare) was washed with  
161 deionized water at pH 7.0. The nickel column was adjusted to pH 2~3. The column  
162 was washed with deionized water at pH 7.0. The nickel column was equilibrated with  
163 10 mM Tris-HCl (pH 8.0) solution (approximately 100 mL). Then, the nickel column  
164 was equilibrated with a 10 mM Tris-HCl (pH 8.0) solution containing 0.5 M sodium  
165 chloride, (approximately 50 mL). Diluted sample was loaded. The sample contained  
166 sodium chloride at a final concentration of 0.5 M. After loading, the column was  
167 washed with 10 mM Tris-HCl (pH 8.0) solution containing 0.5 M sodium chloride.  
168 The proteins were eluted with a 10 mM Tris-HCl (pH 8.0) (containing 0.5 M sodium  
169 chloride) solution containing 15 mM imidazole, 60 mM imidazole, and 300 mM  
170 imidazole, and the protein peaks were collected separately. SDS-PAGE  
171 electrophoresis was used to assess the effect of protein purification.

## 172 **2.6 Antigenicity assessment of the fusion protein**

173 The iELISA method was used to assess the antigenicity of the purified protein.  
174 For the procedure, in a 96-well ELISA plate (NUNC, Denmark), 100  $\mu$ L of fusion

175 protein (2.5 µg/mL, CBS) was added to each well, and 100 µL of LPS (1 µg/mL, CBS)  
176 was added to the wells with positive antigen control and incubated overnight at 4°C.  
177 For blocking, 300 µL of 5% skimmed milk (PBS) was added per well and incubated at  
178 37°C for 2 hours. Then, 100 µL of *Brucella*-positive serum (1:400 dilution, PBS) was  
179 added and incubated at 37°C for 1 hour; next, 100 µL of HRP-labeled protein G  
180 (diluted 1:8000, PBS) was added and incubated at room temperature for 30 min. After  
181 color development with the EL-TMB color kit, the absorbance of the wells was  
182 measured at OD450. After each step, the plates were washed 3 times with PBST.

183 At the same time, we used rabbit sera containing other pathogenic bacteria that  
184 easily cross-react with *Brucella*, including *Yersinia enterocolitica* O9, *Escherichia*  
185 *coli* O157:H7, *Salmonella*, *Vibrio cholerae*, *Vibrio parahaemolyticus*, and *Listeria*  
186 *monocytogenes*. All rabbit sera samples were purchased from Tianjin Biochip  
187 Corporation (Tianjin, China). The specificity of the protein was verified by iELISA. A  
188 1:10000 dilution of HRP-labeled goat anti-rabbit secondary antibody (Bioworld, USA)  
189 was used in this assay, and the remainder of the steps were the same as outlined  
190 above.

## 191 **2.7 Establishment of the p-ELISA method**

192 A puncher was used to make a round sheet of Whatman No. 1 filter paper with a  
193 diameter of 10 mm, and a small hole (a diameter of 6 mm) was punched out of A4  
194 plastic packaging paper. The 10 mm filter paper was placed in the center of the 6 mm  
195 hole in the plastic packaging paper, and a laminating machine joined the filter sheet  
196 and packaging paper, fixing and cutting the combined papers it into small strips with 3

197 holes in each strip. The fellow steps have been described in the literature[11] Five  
198 microliters of chitosan deionized water solution (0.25 mg/mL) was added to the round  
199 holes with Whatman No. 1 filter paper and dried at room temperature; then, 5  $\mu$ L of  
200 2.5% glutaraldehyde solution (PBS) was added, incubated at room temperature for 2  
201 hours, and then washed 3 times with 20  $\mu$ L of deionized water. Then, 5  $\mu$ L of fusion  
202 protein solution (2.5  $\mu$ g/mL, PBS) was added to each well, incubated at room  
203 temperature for 30 min, and washed 3 times with 20  $\mu$ L of deionized water. Next, 20  
204  $\mu$ L of 5% skimmed milk powder was added and incubated for blocking at room  
205 temperature. Subsequently, 5  $\mu$ L of serum (1:400 dilution) was added; after washing 3  
206 times with PBST, 5  $\mu$ L of HRP-labeled protein G (1:8000 dilution, PBS) was added,  
207 incubated at room temperature for 210 s, and washed 3 times with PBST. Finally, 5  
208  $\mu$ L of TMB substrate solution was added, and after 10 min, an HP Laser Jet Pro MFP  
209 M227 was used to scan the samples to obtain images. ImageJ software was used to  
210 perform gray intensity analysis for quantitation. The collected bovine and goat serum  
211 samples were assessed according to the established p-ELISA method, and ROC  
212 curves were used to analyze the diagnostic effect of the established method, including  
213 sensitivity and specificity.

## 214 **2.8 Statistical analysis**

215 Dot plot and receiver operating characteristic (ROC) analyses were performed  
216 using GraphPad Prism version 6.05 for Windows. The significance of gray intensity  
217 differences was determined by Student's t-test (unpaired t-test). Differences were  
218 considered statistically significant when  $P < 0.05$ .



## 221 3 Results

### 222 3.1 B cell epitope peptide prediction and antigenicity verification

226 A total of 22 B cell epitopes were predicted, including BP26, Omp16, Omp25,  
227 Omp31, and Omp2b, which were predicted to have 6, 2, 5, 5, and 4 epitopes (table  
228 S1), respectively. Indirect ELISA results showed that all 22 peptides recognized  
229 portions of the serum (Fig. 1)

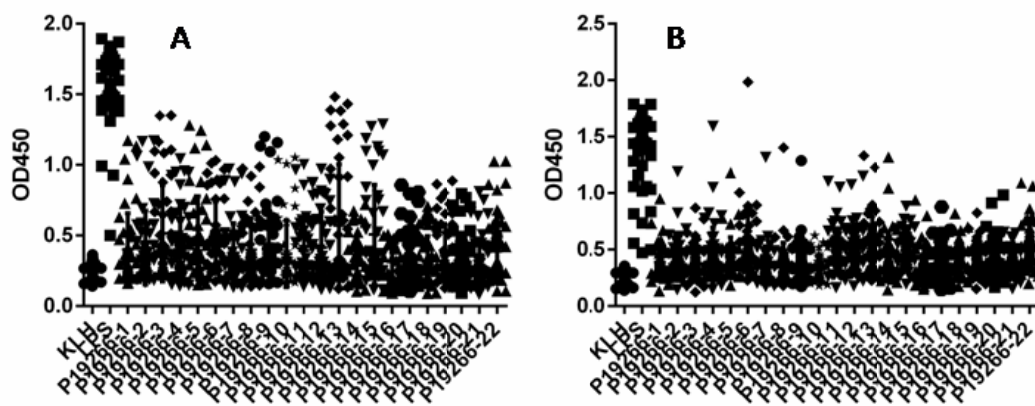

227

229 **Fig. 1 The results of iELISA of each peptide identification-positive brucellosis**  
230 **serum.** (A) Sheep brucellosis serum. (B) Bovine brucellosis serum.

230

### 231 3.2 Preparation of the multiepitope fusion protein

238 The 22 epitopes were connected in series, and the adjacent peptides were  
239 connected with the 'GGGS' linker to form an amino acid sequence of the fusion  
240 protein (Figure S1). Prokaryotic expression was induced by IPTG, and the target  
241 protein was expressed in the supernatant. SDS-PAGE (15%) electrophoresis showed a  
242 protein band with an approximate molecular weight of 66 kD. After mass  
243 spectrometry analysis, it was confirmed that this band was the target protein. After  
244 purification, most of the miscellaneous bands were removed, and gray intensity

240 analysis showed that the purity of the purified protein was approximately 90% (Fig.  
241 2).

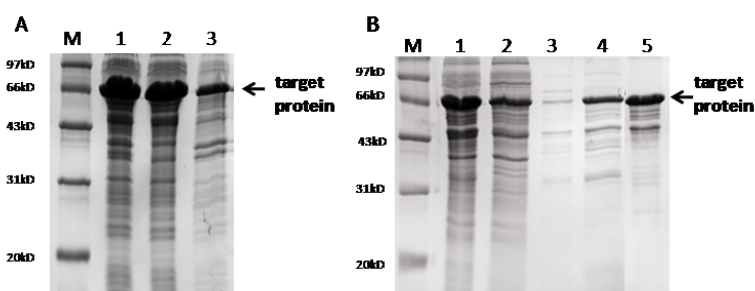

241  
247 **Fig. 2 SDS-PAGE analysis of fusion protein.** (A) Protein expression results. M,  
248 marker; lane 1, whole bacteria after ultrasound; lane 2, supernatant after ultrasound;  
249 lane 3, precipitation after ultrasound. (B) SDS-PAGE after protein purification. M,  
250 marker; lane 1, the original protein before purification; lane 2, flow-through solution;  
251 lane 3, 15mM imidazole elution fraction; lane 4, 60mM imidazole elution fraction; lane  
252 5, 300mM imidazole elution fraction.

### 248 3.3 Antigenicity assessment of the fusion protein

259 After iELISA analysis, when the fusion protein was used as an antigen to test its  
260 diagnostic ability with goat serum, the area under the ROC curve was 0.9799 (95% CI,  
261 0.9654 to 0.9944), and the cutoff value calculated by the Youden Index was 0.4675. In  
262 this case, the diagnostic sensitivity was 87.14% (95% CI, 0.8044 to 0.9220), and the  
263 specificity was 100.0% (95% CI, 0.9340 to 1.000). The positive predictive value was  
264 100.0%, and the negative predictive value was 75.00%. When LPS was used as an  
265 antigen to test its diagnostic ability with goat serum, the area under the ROC curve  
266 was 0.9514 (95% CI, 0.9191 to 0.9836), the cutoff value was 0.8890, the diagnostic  
267 sensitivity was 82.00% (95% CI, 0.7305 to 0.8897), and the specificity was 95.83%  
268 (95% CI, 0.8575 to 0.9949). The positive predictive value was 98.39%, and the  
269 negative predictive value was 74.29% (Fig. 3 and table 1).

260 To test its diagnostic ability with bovine serum, the area under the ROC curve

269 was 0.9518 (95% CI, 0.9224 to 0.9812), and the cutoff value calculated by the Youden  
270 index was 0.4530. In this case, the diagnostic sensitivity was 88.79% (95% CI, 0.8160  
271 to 0.9390), and the specificity was 93.33% (95% CI, 0.8512 to 0.9780). The positive  
272 predictive value was 95.37%, and the negative predictive value was 84.34%. When  
273 LPS was used as an antigen to diagnose bovine serum, the area under the ROC curve  
274 was 0.9528 (95% CI, 0.9187 to 0.9868), and the cutoff value was 0.8105. In this case,  
275 the diagnostic sensitivity was 90.63% (95% CI, 0.8295 to 0.9562), and the specificity  
276 was 90.28% (95% CI, 0.8099 to 0.9600). The positive predictive value was 93.86%,  
277 and the negative predictive value was 88.31% (Fig. 4 and table 1).

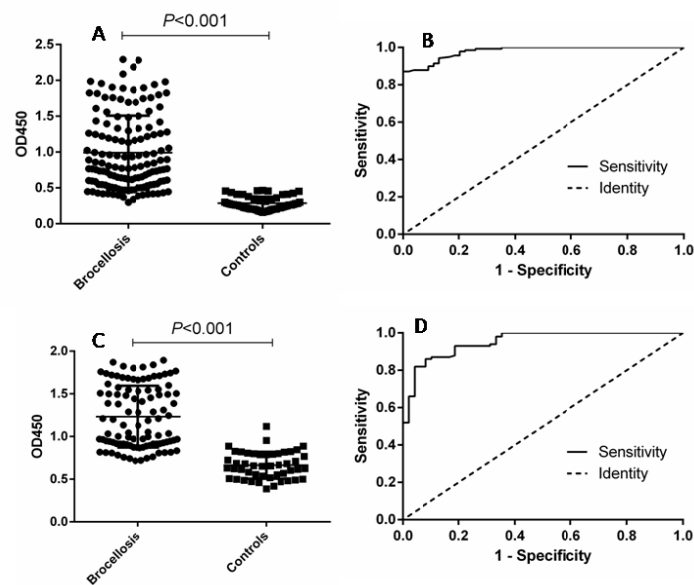

270  
273 **Fig. 3** ELISA analysis of goat serum samples. (A) Dotplot of the fusion protein ELISA assay. (B)  
274 ROC analysis of fusion protein IELISA assay results. (C) Dotplot of the LPS antigen ELISA assay.  
275 (D) ROC analysis of LPS antigen ELISA assay results.

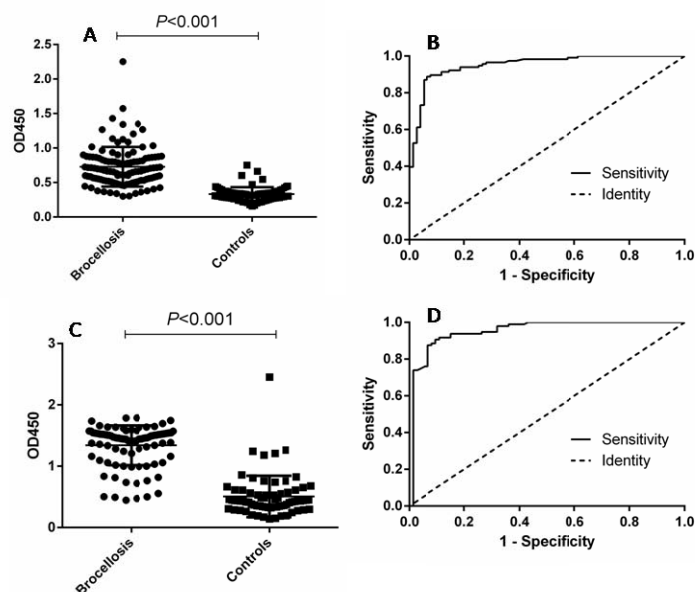

274

277 **Fig 4** ELISA analysis of cattle serum samples. (A) Dotplot of the fusion protein ELISA assay. (B)

278 ROC analysis of fusion protein IELISA assay results. (C) Dotplot of the LPS antigen ELISA assay.

279 (D) ROC analysis of LPS antigen ELISA assay results.

278 Table 1. Positive and negative predictive values of the test calculated for different cut-off values

| Cut-off value                               | Positive |    | Negative |    | PPV (%) | NPV (%) |
|---------------------------------------------|----------|----|----------|----|---------|---------|
|                                             | TP       | FN | TN       | FP |         |         |
| $\geq 0.4675$ (Fusion protein) <sup>a</sup> | 122      | 18 | 54       | 0  | 100.0   | 75.00   |
| $\geq 0.8890$ (LPS) <sup>a</sup>            | 122      | 18 | 52       | 2  | 98.39   | 74.29   |
| $\geq 0.4530$ (Fusion protein) <sup>b</sup> | 103      | 13 | 70       | 5  | 95.37   | 84.34   |
| $\geq 0.8105$ (LPS) <sup>b</sup>            | 107      | 9  | 68       | 7  | 93.86   | 88.31   |
| $\geq 34.12$ (p-ELISA) <sup>a</sup>         | 139      | 1  | 53       | 1  | 99.29   | 98.15   |
| $\geq 30.21$ (p-ELISA) <sup>b</sup>         | 114      | 2  | 73       | 2  | 98.28   | 97.33   |

281 a, goat sera; b, cattle sera. TP, true positives; TN, true negatives; FP, false positives; FN, false

282 negatives; PPV, positive predictive value  $(TP/TP+FP) \times 100$ ; NPV, negative predictive value

283  $(TN/TN+FN) \times 100$ .

282

### 283 3.4 Determining the cross-reactivity with the fusion protein

284 To verify whether the fusion protein as a diagnostic antigen shows



284 cross-reactivity with other bacteria, we selected 6 zoonotic pathogens for a  
285 cross-reactivity test. The results showed that the fusion protein did not cross-react  
286 with other bacteria according to an S/N (OD450, sample/negative) > 2.1, which  
287 indicated that the fusion protein as a diagnostic antigen has good specificity (table 2).  
288 Table 2 Specific cross-reactivity test results of the indirect ELISA diagnostic method  
289 for the fusion protein.

| Rabbit sample                     | OD450  | S/N  |
|-----------------------------------|--------|------|
| <i>Vibrio parahaemolyticus</i>    | 0.1230 | 1.64 |
| <i>Escherichia coli</i> O157:H7   | 0.0457 | 0.61 |
| <i>Salmonella</i>                 | 0.1267 | 1.69 |
| <i>Vibrio cholerae</i>            | 0.0598 | 0.80 |
| <i>Yersinia enterocolitica</i> O9 | 0.0443 | 0.59 |
| <i>Listeria monocytogenes</i>     | 0.0758 | 1.01 |
| Negative                          | 0.0751 | --   |

290

### 291 **3.5 Evaluation of the diagnostic ability of the p-ELISA**

292 To verify the effectiveness of the established p-ELISA method, the collected  
293 serum samples were tested. When diagnosing goat sera, the area under the ROC curve  
294 was 0.9986 (95% CI, 0.9957 to 1.002). The cutoff value was 34.12, the diagnostic  
295 sensitivity was 98.85% (95% CI, 0.9376 to 0.9997), and the specificity was 98.51%  
296 (95% CI, 0.9196 to 0.9996). The positive predictive value was 99.29%, and the  
297 negative predictive value was 98.15% (table 1). When testing its activity in bovine

298 serum, the area under the ROC curve was 0.9964 (95% CI, 0.9910 to 1.002), and the  
299 cutoff value calculated by the Youden index was 30.21. In this case, the diagnostic  
300 sensitivity was 97.85% (95% CI, 0.9245 to 1.002), and the specificity was 96.61% (95%  
301 CI, 0.8829 to 0.9959). The positive predictive value was 98.28%, and the negative  
302 predictive value was 97.33% (table 1).

303

#### 304 **4 Discussion**

305 Brucellosis is a serious zoonotic disease. Bovine and goats are the most  
306 commonly infected animals[12]. Currently, culling infected livestock is widely used  
307 to eradicate brucellosis worldwide[13]. The accurate diagnosis of livestock is  
308 essential for the prevention and control of the disease and for reducing unnecessary  
309 economic losses. Particularly in China, where the base of bovine and goats is  
310 relatively large, fast and efficient screening methods are of great significance[14].  
311 Serological diagnostic techniques, mainly the agglutination test, RBPT, complement  
312 fixation test (CFT), ELISA, immunochromatographic diagnostic test (ICDT), and  
313 fluorescence polarization assay (FPA), are currently the commonly used screening  
314 methods for brucellosis[15,16]. Serological methods have the advantages of high  
315 sensitivity and a short operation time. Serological methods are the most commonly  
316 used methods for diagnosing brucellosis, but the existing serological diagnostic  
317 methods have the shortcomings of cross-reactivity with other bacteria (such as  
318 *Escherichia coli* O157:H7 and *Yersinia enterocolitica* O9)[17], which easily results in

319 false positives. Reducing cross-reactions with other bacterial species is the key to  
320 improving the diagnostic specificity of serological methods.

321 ELISA is currently the most widely studied serological diagnosis method, even as  
322 diagnostic confirmation in brucellosis[16]. The main problem with using ELISAs for  
323 the diagnosis of brucellosis is the choice of antigen, but to date, ELISA-based  
324 diagnoses lack a single standard antigen[18]. Currently, the most commonly used  
325 diagnostic antigens used in ELISA are whole bacteria or extracts. These diagnostic  
326 antigens are prone to cross-reactivity with other bacteria, have poor specificity and  
327 have considerable defects. Therefore, the development of new diagnostic antigens is  
328 key to improving the diagnostic effect of ELISAs.

329 B cell epitopes refer to antigen regions that can be recognized by B cell receptors  
330 (BCRs) or antibodies produced by the humoral immune system. Epitope recognition  
331 is an important aspect of immunology. The rapid development of bioinformatics  
332 provides convenient ways and methods for epitope prediction[19]. Bioinformatics  
333 tools can be used to select potential cell epitopes without cultivating pathogens, which  
334 has the advantages of rapid testing and low cost[20]. Currently, B cell epitope  
335 prediction tools include databases, algorithms, and web servers. In this study, five  
336 main antigen components of *Brucella* were selected, and 22 effective epitopes were  
337 successfully predicted using the IEDB website. After iELISA verification, each  
338 peptide was used to identify a certain sample of brucellosis serum. Therefore,  
339 combining these peptides to construct new protein antigens can theoretically increase

340 the recognition of proteins in serum. The results of the iELISA confirmed our  
341 hypothesis. The diagnostic specificity of this protein was higher than that of LPS, and  
342 it did not cross-react with other bacteria. The fusion protein we constructed has  
343 potential value as a diagnostic antigen.

344 In recent years, new disease diagnosis and pathogen detection technologies have  
345 been developed based on ELISA. Among these technologies, the p-ELISA has been  
346 rapidly developed and widely used in related fields such as health testing and  
347 diagnosis[21]. The p-ELISA method is a new technology developed based on the  
348 traditional ELISA method principle, using paper as the solid-phase carrier[22].  
349 Compared with the traditional ELISA method, p-ELISA is faster and can be used to  
350 detect proteins within 1 hour. Less reagent and only 2-5  $\mu$ L of the samples are  
351 required, no special instruments such as microplate readers are needed (only smart  
352 phones or cameras are needed to take photos, combined with Photoshop and other  
353 software to complete the data analysis), and the carrier is replaced with harmless  
354 easy-to-handle paper, which greatly saves costs and provides a new research direction  
355 for the development of new methods for the diagnosis of brucellosis [23]. Currently,  
356 the most common paper-processing method of the p-ELISA method involves  
357 constructing hydrophilic and hydrophobic areas through wax printing technology.  
358 This method often requires expensive printers, which limits the application of this  
359 method. We use plastic-encapsulated paper to construct the hydrophobic area,  
360 punching small holes into it, filling the small holes with hydrophilic paper sheets to  
361 make a sandwich structure. The paper can be processed with an ordinary laminator;

362 therefore, the cost is low. Through serum detection, p-ELISA has a better diagnostic  
363 outcome. Compared with the traditional ELISA method, it has improved sensitivity  
364 and specificity, and the dosage of the reagents and the time of the operation are  
365 significantly reduced. This method can simultaneously detect bovine and goat  
366 brucellosis and has certain application prospects.

367 In conclusion, we predicted 22 B cell epitopes by using bioinformatics  
368 technology and successfully constructed a *Brucella* diagnostic antigen. Combined  
369 with this antigen, we constructed a p-ELISA method that can be used to diagnose  
370 bovine and goat brucellosis simultaneously. However, currently, it is extremely  
371 difficult to identify all affected animals from epidemiological units through  
372 serological tests, and there is no serological test able to differentiate between affected  
373 and vaccinated animals. The p-ELISA method we have constructed cannot yet solve  
374 the two questions mentioned above. In addition, our study is only preliminary, the  
375 number of samples is small, and the selected samples, especially *Brucella*-positive  
376 samples, represent highly positive samples. The effectiveness of this method needs  
377 further study, such as by testing a large number of random samples.

### 378 **Acknowledgments**

### 379 **Conflict of Interest**

380 The authors declare no potential conflicts of interest with respect to the research,  
381 authorship, and/or publication of this article.

## 382 **Funding**

383 This work was supported by the National Natural Science Foundation of China  
384 (Grant number 81802101). The funders had no role in the study design, data  
385 collection and analysis, decision to publish, or preparation of the manuscript.

386

## 387 **References**

- 388 1. Pappas G, Papadimitriou P, Akritidis N, Christou L, Tsianos EV. The new global  
389 map of human brucellosis. *Lancet Infect Dis.* 2006;6:91-99.
- 390 2. Olsen SC, Palmer MV. Advancement of knowledge of *Brucella* over the past 50  
391 years. *Vet Pathol.* 2014;51:1076-1089.
- 392 3. Deng Y, Liu X, Duan K, Peng Q. Research Progress on Brucellosis. *Curr Med*  
393 *Chem.* 2019;26:5598-5608.
- 394 4. Franco MP, Mulder M, Gilman RH, Smits HL. Human brucellosis. *Lancet Infect*  
395 *Dis.* 2007;7:775-786.
- 396 5. Araj GF. Update on laboratory diagnosis of human brucellosis. *Int J Antimicrob*  
397 *Agents.* 2010;36 Suppl 1:12-17.
- 398 6. Yagupsky P, Morata P, Colmenero JD. Laboratory Diagnosis of Human Brucellosis.  
399 *Clin Microbiol Rev.* 2019;33:e00073-19.
- 400 7. Gupta S, Singh D, Gupta M, Bhatnagar R. A combined subunit vaccine comprising  
401 BP26, Omp25 and L7/L12 against brucellosis. *Pathog Dis* 2019;77:ftaa002.
- 402 8. Rezaei M, Rabbani-Khorasgani M, Zarkesh-Esfahani SH, Emamzadeh R, Abtahi H.  
403 Prediction of the Omp16 Epitopes for the Development of an Epitope-based Vaccine

- 404 Against Brucellosis. *Infect Disord Drug Targets* 2019;19:36-45.
- 405 9. Verdiguél-Fernández L, Oropeza-Navarro R, Ortiz A, Robles-Pesina MG,  
406 Ramírez-Lezama J, Castañeda-Ramírez A, Verdugo-Rodríguez A. *Brucella melitensis*  
407 omp31 Mutant Is Attenuated and Confers Protection Against Virulent *Brucella*  
408 *melitensis* Challenge in BALB/c Mice. *J Microbiol Biotechnol* 2020;30:497-504.
- 409 10. Cheng CM, Martinez AW, Gong J, Mace CR, Phillips ST, Carrilho E, Mirica KA,  
410 Whitesides GM. Paper-based ELISA. *Angew Chem Int Ed Engl* 2010;49:4771-4774.
- 411 11. Wang S, Ge L, Song X, Yu J, Ge S, Huang J, Zeng F. Paper-based  
412 chemiluminescence ELISA: lab-on-paper based on chitosan modified paper device  
413 and wax-screen-printing. *Biosens Bioelectron* 2012;31:212-218.
- 414 12. Zheng R, Xie S, Lu X, Sun L, Zhou Y, Zhang Y, Wang K. A Systematic Review  
415 and Meta-Analysis of Epidemiology and Clinical Manifestations of Human  
416 Brucellosis in China. *Biomed Res Int.* 2018; 2018:5712920.
- 417 13. Zhang N, Huang D, Wu W, Liu J, Liang F, Zhou B, Guan P. Animal brucellosis  
418 control or eradication programs worldwide: A systematic review of experiences and  
419 lessons learned. *Prev Vet Med.* 2018;160:105-115.
- 420 14. Zhong Z, Yu S, Wang X, Dong S, Xu J, Wang Y, Chen Z, Ren Z, Peng G. Human  
421 brucellosis in the People's Republic of China during 2005-2010. *Int J Infect Dis.*  
422 2013;17:e289-92.
- 423 15. Khan MZ, Zahoor M. An Overview of Brucellosis in Cattle and Humans, and its  
424 Serological and Molecular Diagnosis in Control Strategies. *Trop Med Infect Dis.*  
425 2018;3:65.

- 426 16. Nielsen K, Yu WL. Serological diagnosis of brucellosis. *Prilozi*.2010;31:65-89.
- 427 17. Chart H, Okubadejo OA, Rowe B. The serological relationship between  
428 *Escherichia coli* O157 and *Yersinia enterocolitica* O9 using sera from patients with  
429 brucellosis. *Epidemiol Infect.* 1992;108:77-85.
- 430 18. Ducrottoy MJ, Muñoz PM, Conde-Álvarez R, Blasco JM, Moriyón I. A systematic  
431 review of current immunological tests for the diagnosis of cattle brucellosis. *Prev Vet*  
432 *Med.* 2018;151:57-72.
- 433 19. D'Annessa I, Di Leva FS, La Teana A, Novellino E, Limongelli V, Di Marino D.  
434 Bioinformatics and Biosimulations as Toolbox for Peptides and Peptidomimetics  
435 Design: Where Are We? *Front Mol Biosci* 2020;7:66.
- 436 20. Agyei D, Tsopmo A, Udenigwe CC. Bioinformatics and peptidomics approaches  
437 to the discovery and analysis of food-derived bioactive peptides. *Anal Bioanal Chem*  
438 2018;410:3463-3472.
- 439 21. Pang B, Zhao C, Li L, Song X, Xu K, Wang J, Liu Y, Fu K, Bao H, Song D, Meng  
440 X, Qu X, Zhang Z, Li J. Development of a low-cost paper-based ELISA method for  
441 rapid *Escherichia coli* O157:H7 detection. *Anal Biochem* 2018;542:58-62.
- 442 22. Wang S, Ge L, Song X, Yu J, Ge S, Huang J, Zeng F. Paper-based  
443 chemiluminescence ELISA: lab-on-paper based on chitosan modified paper device  
444 and wax-screen-printing. *Biosens Bioelectron* 2012;31:212-218.
- 445 23. Hsu MY, Hung YC, Hwang DK, Lin SC, Lin KH, Wang CY, Choi HY, Wang YP,  
446 Cheng CM. Detection of aqueous VEGF concentrations before and after intravitreal  
447 injection of anti-VEGF antibody using low-volume sampling paper-based ELISA. *Sci*



448 Rep. 2016;6:34631.
